# Supplementary material for: Effects of two different solvents on the syntheses, structural diversity, and magnetic properties of six Mn(ii) complexes derived from 3,3′-((5-carboxy-1,3-phenylene)bis(oxy))dibenzoate and variable N-donor ligands
Source: Royal Society of Chemistry journal article supplement (doi:10.1039/d0ce01383h), 2020-01-01
Supplement: d0ce01383h1.pdf [file d0ce01383h1.pdf]

## Supporting Information

### Effects of two different solvents on the syntheses, structural diversity, magnetic property of six Mn<sup>2+</sup> complexes derived from 3,3'-((5-carboxy-1,3-phenylene)bis(oxy))dibenzate and variable N-donor ligands

Dongdong Yang,<sup>†\*a,b</sup> Xiaxia Liu,<sup>†a</sup> Liping Lu,<sup>\*a</sup> and Miaoli Zhu<sup>\*a,c</sup>

<sup>a</sup>Institute of Molecular Science, Key Laboratory of Chemical Biology and Molecular Engineering of the Education Ministry, Shanxi University, Taiyuan, Shanxi 030006, People's Republic of China.

<sup>b</sup>Beijing Key Laboratory of Energy Conversion and Storage Materials, College of Chemistry, Beijing Normal University, Beijing 100875, P. R. China.

<sup>c</sup>Key Laboratory of Materials for Energy Conversion and Storage of Shanxi Province; Shanxi University, Taiyuan, Shanxi 030006, People's Republic of China.

Corresponding Author

\*E-mail: [luliping@sxu.edu.cn](mailto:luliping@sxu.edu.cn)

\*E-mail: [miaoli@sxu.edu.cn](mailto:miaoli@sxu.edu.cn)

### Contents

**S1** Tries of synthesis and crystal growth conditions

**S2.** The FT-IR spectra of H<sub>3</sub>cpboda and **1-6**

**Fig. S1** The IR spectra of H<sub>3</sub>cpboda ligand and complexes **1-6**

**Fig. S2** The PXRD of complexes **1-6**

**Fig. S3** The thermal curves of complexes **1-6**.

**Fig. S4** The 3D structure of **3** ( $\pi \cdots \pi$  interactions)

**Table S1** Solvent systems and synthetic methods of **1-6**

**Tables S2.** Selected bond lengths (Å) and angles (°) for complexes **1-6**.

## **S1. Tries of synthesis and crystal growth conditions**

### **S1.1 Ratio of solvents**

**S1.1.1 Complex 1.** A mixture of H<sub>3</sub>cpboda (39.50 mg, 0.1 mmol), MnSO<sub>4</sub>·H<sub>2</sub>O (25.40 mg, 0.15 mmol), DMF (8.0 mL) and NaOH (0.80 mg, 0.02 mmol), then the mixture was sealed into Teflon-lined stainless steel container and heated at 120°C for 72 h. The white powder were collected by filtration, and simulated and experimental PXRD patterns of complex **1** (Fig. S2a).

**S1.1.2.1 Complex 2.** A mixture of H<sub>3</sub>cpboda (39.50 mg, 0.1 mmol), MnSO<sub>4</sub>·H<sub>2</sub>O (25.40 mg, 0.15 mmol), 1,4-bib (31.5 mg, 0.15 mmol), NaOH (0.80 mg, 0.02 mmol) and DMF/H<sub>2</sub>O (7mL, 3:4V/V) was placed in a 15 mL Teflon-lined stainless steel vessel, heated to 120°C for 72 h, followed by slow cooling to room temperature. Colorless block-shaped crystals were collected by filtration, washed with H<sub>2</sub>O several times, and dried in air (yield 60%, based on H<sub>3</sub>cpboda).

**S1.1.2.2 Complex 2.** With the same synthetic method as above, except that DMF/H<sub>2</sub>O (7mL, 3:4V/V) were replaced by DMF/H<sub>2</sub>O (7mL, 1:6V/V). Colorless block-like crystals of **2** were obtained in 50% yield (based on H<sub>3</sub>cpboda). The resulting colorless block-like crystals of **2** were isolated by washing with H<sub>2</sub>O, and dried in air.

**S1.1.3.1 Complex 3.** H<sub>3</sub>cpboda (39.50 mg, 0.1 mmol), MnSO<sub>4</sub>·H<sub>2</sub>O (25.40 mg, 0.15 mmol), phen (29.70 mg, 0.15 mmol), NaOH (0.80 mg, 0.02 mmol), DMF(3ml) and H<sub>2</sub>O (4ml) was placed in a 15 mL Teflon-lined stainless steel vessel, heated to 120°C for 72 h. Giving colorless block crystals of **3**. Yield of 63% (based on H<sub>3</sub>cpboda).

**S1.1.3.2 Complex 3.** With the same synthetic method as above, except that DMF/H<sub>2</sub>O (7mL, 3:4V/V) were replaced by DMF/H<sub>2</sub>O (7mL, 1:6V/V). Colorless block-like crystals of **3** were obtained in 42% yield (based on H<sub>3</sub>cpboda). The resulting colorless block-like crystals of **3** were isolated by washing with H<sub>2</sub>O, and dried in air.

### **S1.2 Reacting temperature**

**S1.2.1 Complex 2.** A mixture of H<sub>3</sub>cpboda (39.50 mg, 0.1 mmol), MnSO<sub>4</sub>·H<sub>2</sub>O (25.40 mg, 0.15 mmol), 1,4-bib (31.5 mg, 0.15 mmol), NaOH (0.80 mg, 0.02 mmol), DMF(5ml) and H<sub>2</sub>O (2ml), then the mixture was sealed into Teflon-lined stainless steel container and heated at 140°C and 160°C for 72 h, respectively. Colorless block-like crystals of **2** were obtained in 58% yield in 140°C and 53% yield in 160°C, respectively. (based on H<sub>3</sub>cpboda).

**S1.2.2 Complex 3.** A mixture of H<sub>3</sub>cpboda (39.50 mg, 0.1 mmol), MnSO<sub>4</sub>·H<sub>2</sub>O (25.40 mg, 0.15 mmol), phen (29.70 mg, 0.15 mmol), NaOH (0.80 mg, 0.02 mmol), DMF(5ml) and H<sub>2</sub>O (2ml), then the mixture was sealed into Teflon-lined stainless steel container and heated at 140°C and 160°C for 72 h, respectively. Colorless block-like crystals of **3** were obtained in 58% yield in 140°C and 44% yield in 160°C, respectively. (based on H<sub>3</sub>cpboda).

### **S1.3 Dosage of metal ion**

**S1.3.1 Complex 1.** A mixture of H<sub>3</sub>cpboda (39.50 mg, 0.1 mmol), MnSO<sub>4</sub>·H<sub>2</sub>O (42.32 mg, 0.25 mmol), NaOH (0.80 mg, 0.02 mmol) and DMF/H<sub>2</sub>O (8mL, 5:3V/V) was placed in a 15 mL Teflon-lined stainless steel vessel, heated to 120°C for 72 h, Colorless block-shaped crystals were collected by filtration, washed with H<sub>2</sub>O and dried in air, yield 48% (based on H<sub>3</sub>cpboda).

**S1.3.2.1 Complex 2.** A mixture of H<sub>3</sub>cpboda (39.50 mg, 0.1 mmol), MnSO<sub>4</sub>·H<sub>2</sub>O (8.46 mg, 0.05 mmol), 1,4-bib (31.5 mg, 0.15 mmol), NaOH (0.80 mg, 0.02 mmol) and DMF/H<sub>2</sub>O (7 mL, 5:2 V/V) was placed in a 15 mL of Teflon-lined stainless steel vessel, heated to 120°C for 72 h, Colorless block-shaped crystals were collected by filtration, washed with H<sub>2</sub>O several times, and dried in air (yield 15%, based on H<sub>3</sub>cpboda).

**S1.3.2.2** With the same synthetic method as above, except that MnSO<sub>4</sub>·H<sub>2</sub>O (8.46 mg, 0.05 mmol) were replaced by MnSO<sub>4</sub>·H<sub>2</sub>O (42.32 mg, 0.25 mmol). Colorless block-like crystals of **2** were obtained in 70% yield (based on H<sub>3</sub>cpboda). The resulting colorless block-like crystals of **2** were isolated by washing with H<sub>2</sub>O, and dried in air.

**S1.3.3.1 Complex 3.** A mixture of H<sub>3</sub>cpboda (8.46 mg, 0.05 mmol), MnSO<sub>4</sub>·H<sub>2</sub>O (16.93 mg, 0.1 mmol), phen (29.70 mg, 0.15 mmol), NaOH (0.80 mg, 0.02 mmol) and DMF/H<sub>2</sub>O (7 mL, 5:2 V/V) was placed in a 15 mL of Teflon-lined stainless steel vessel, heated to 120°C for 72 h, Colorless block-shaped crystals were collected by filtration, washed with H<sub>2</sub>O several times, and dried in air (yield 23%, based on H<sub>3</sub>cpboda).

**S1.3.3.2** With the same synthetic method as above, except that MnSO<sub>4</sub>·H<sub>2</sub>O (8.46 mg, 0.05 mmol) were replaced by MnSO<sub>4</sub>·H<sub>2</sub>O (42.32 mg, 0.25 mmol). Colorless block-like crystals of **3** were obtained in 62% yield (based on H<sub>3</sub>cpboda). The resulting colorless block-like crystals of **3** were isolated by washing with H<sub>2</sub>O, and dried in air.

## S2. The FT-IR spectra of H<sub>3</sub>cpboda and 1-6

The FT-IR spectra of H<sub>3</sub>cpboda and 1-6 are given in Fig. S1. In the spectra, the peaks at 3600-3400 cm<sup>-1</sup>, attributed to the O-H stretching vibrations of water molecules.<sup>S1</sup> The strong bands from 1691 to 1376 cm<sup>-1</sup> correspond to the COO<sup>-</sup> symmetric stretching vibrations.<sup>S2</sup> The absorption peaks located at about 1200 cm<sup>-1</sup> can be attributed to the C-O-C vibration of the ligand. Furthermore, the peaks at 840-650 cm<sup>-1</sup> were assigned to the bending frequencies of O-C=O groups.<sup>S3</sup>

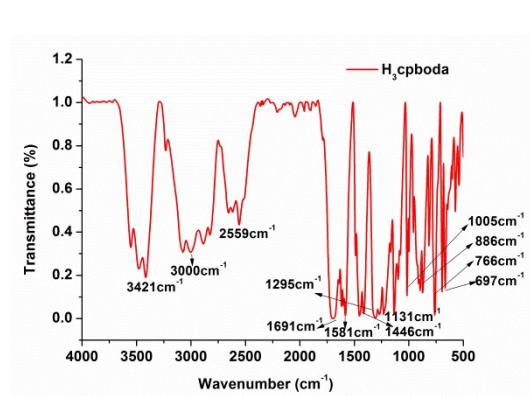

Fig. S1a

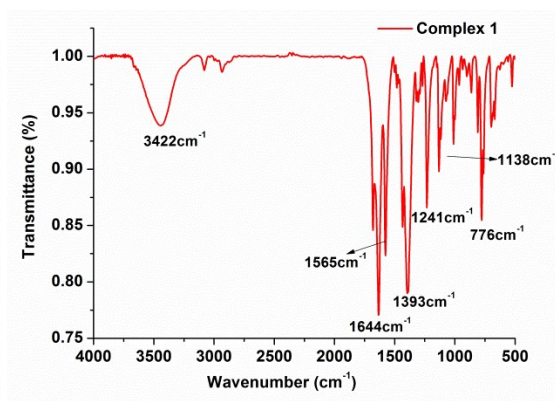

Fig. S1b

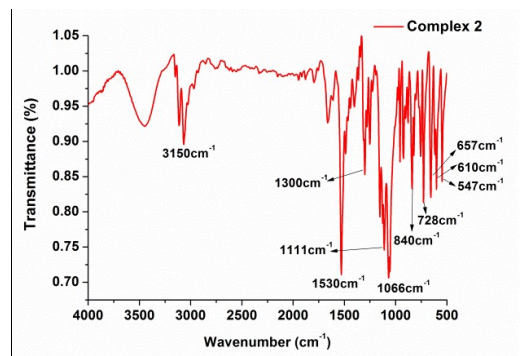

Fig. S1c

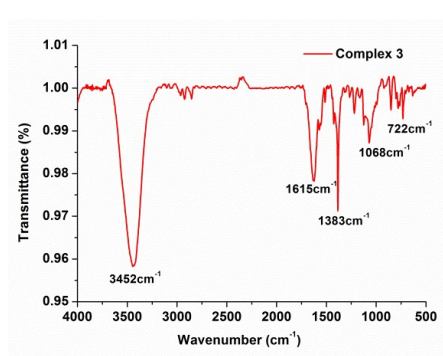

Fig. S1d

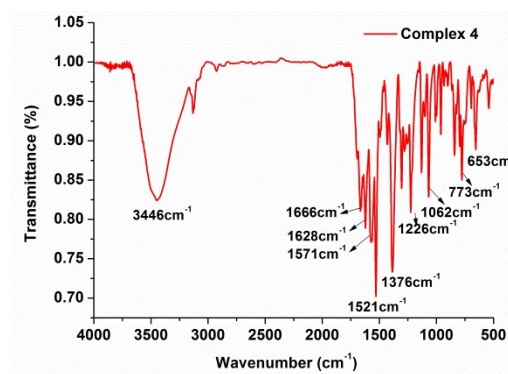

Fig. S1e

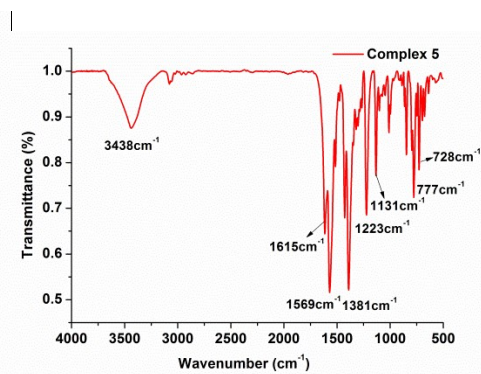

Fig. S1f

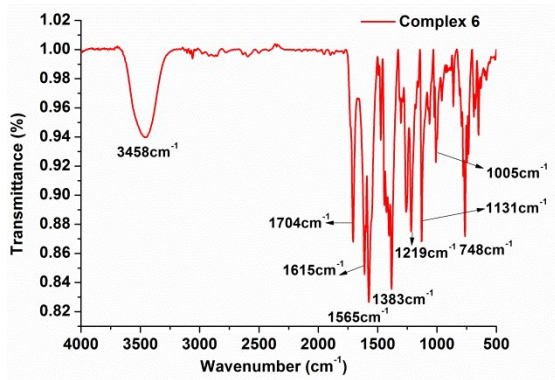

Fig. S1g

Fig. S1 The IR spectra of H<sub>3</sub>cpboda ligand and complexes 1-6

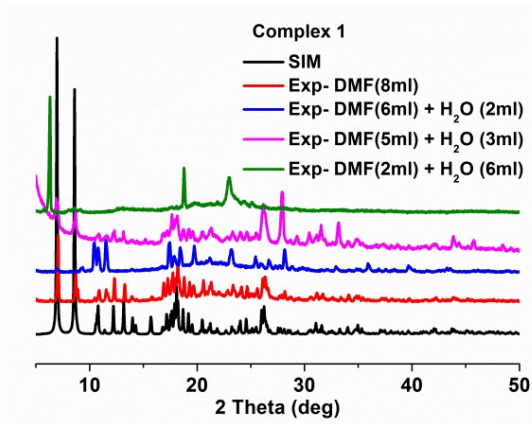

(a)

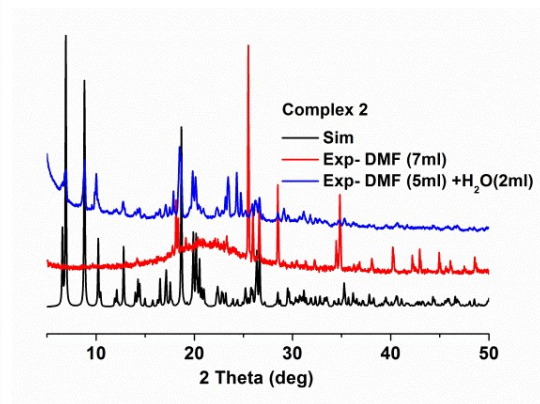

(b)

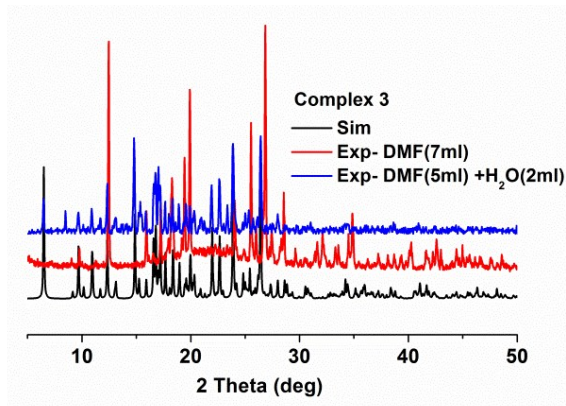

(c)

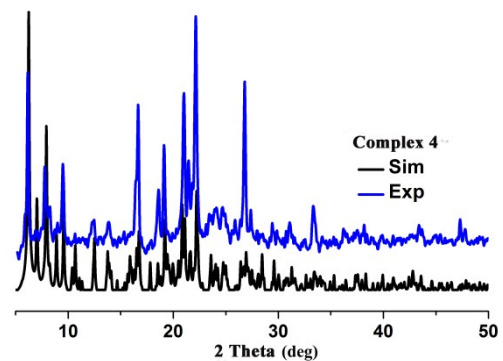

(d)



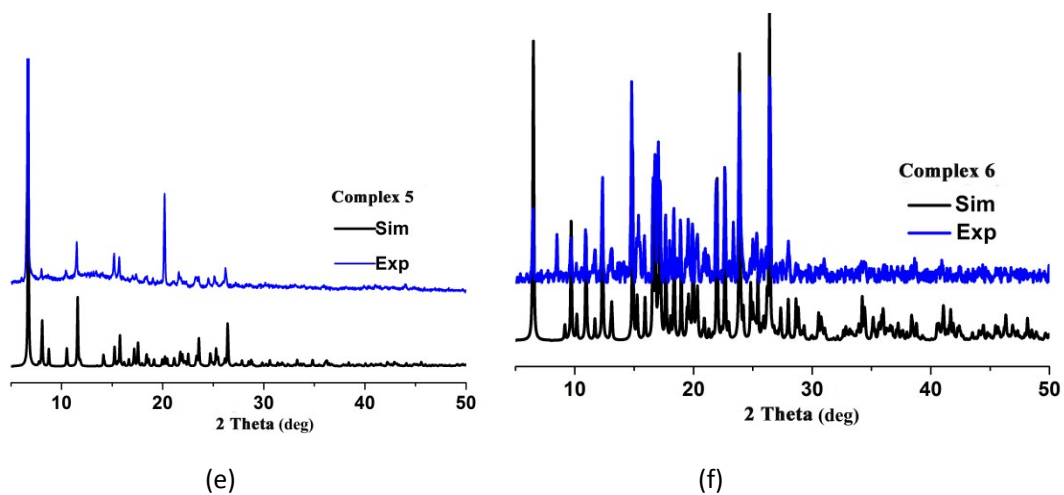

Fig. S2 The PXRD of complexes 1-6

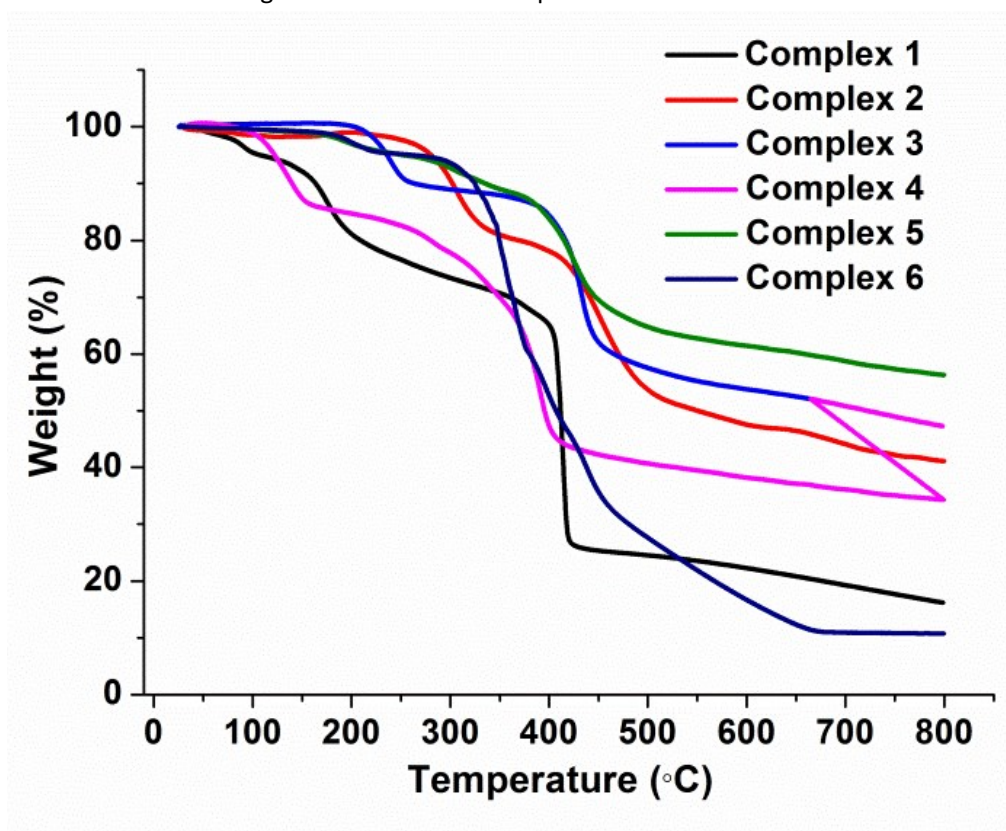

Fig. S3 The thermal curves of complexes 1a-4b.

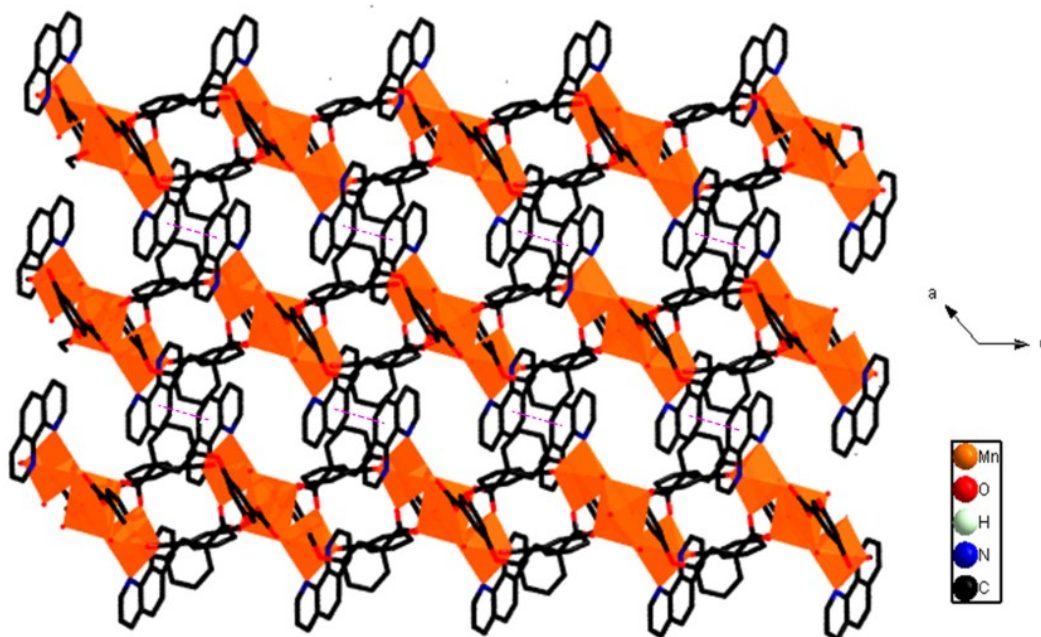

Fig. S4 A perspective view of the three-dimensional supramolecular structure to crystallographically equivalent nets *via*  $\pi\cdots\pi$  interactions in **3**.

**Table S1** Tries of synthesis and crystal growth conditions **1–5**

| Related synthesis of complex <b>1</b> | Variable            |                                     | Results                                                       |                                          |
|---------------------------------------|---------------------|-------------------------------------|---------------------------------------------------------------|------------------------------------------|
|                                       | Solvent ratio       |                                     | DMF(8ml)                                                      | Crystal not for X-ray single diffracting |
|                                       |                     |                                     | DMF(6ml),<br>H <sub>2</sub> O (2 ml)                          | Precipitation                            |
|                                       |                     |                                     | DMF(4ml),<br>H <sub>2</sub> O (4 ml)                          | Solution                                 |
|                                       |                     |                                     | DMF(2ml),<br>H <sub>2</sub> O (6 ml)                          | Precipitation                            |
|                                       | Temperature(°C)     |                                     | 120 °C                                                        | Crystals of complex <b>1</b>             |
|                                       |                     |                                     | 140 °C                                                        | Solution                                 |
|                                       |                     |                                     | 160 °C                                                        | Solution                                 |
|                                       | Dosage of metal ion |                                     | MnSO <sub>4</sub> ·H <sub>2</sub> O (8.46 mg,<br>0.05 mmol)   | Solution                                 |
|                                       |                     |                                     | MnSO <sub>4</sub> ·H <sub>2</sub> O (25.40 mg,<br>0.15 mmol ) | Crystals of complex <b>1</b>             |
|                                       |                     | MnSO <sub>4</sub> ·H <sub>2</sub> O | Crystals of complex <b>1</b>                                  |                                          |

|  |                   |                                      |               |
|--|-------------------|--------------------------------------|---------------|
|  |                   | O (42.32 mg,<br>0.25 mmol)           |               |
|  |                   |                                      |               |
|  | Different solvent | EtOH(5ml,<br>H <sub>2</sub> O (3 ml) | Precipitation |
|  |                   | EtOH(2ml,<br>H <sub>2</sub> O (6 ml) | Precipitation |

| Related synthesis of<br>complex 2 | Variable            |                                                                  | Results                                                        |                       |
|-----------------------------------|---------------------|------------------------------------------------------------------|----------------------------------------------------------------|-----------------------|
|                                   | Solvent ratio       |                                                                  | DMF(7ml)                                                       | Precipitation         |
|                                   |                     |                                                                  | DMF(3ml),<br>H <sub>2</sub> O (4 ml)                           | Crystals of complex 2 |
|                                   |                     |                                                                  | DMF(1ml),<br>H <sub>2</sub> O (6 ml)                           |                       |
|                                   |                     |                                                                  |                                                                |                       |
|                                   | Temperature(°C)     |                                                                  | 120 °C                                                         | Crystals of complex 2 |
|                                   |                     |                                                                  | 140 °C                                                         |                       |
|                                   |                     |                                                                  | 160 °C                                                         |                       |
|                                   |                     |                                                                  |                                                                |                       |
|                                   | Dosage of metal ion |                                                                  | MnSO <sub>4</sub> ·H <sub>2</sub><br>O (8.46 mg,<br>0.05 mmol) | Crystals of complex 2 |
|                                   |                     | MnSO <sub>4</sub> ·H <sub>2</sub><br>O (25.40 mg,<br>0.15 mmol ) |                                                                |                       |
|                                   |                     | MnSO <sub>4</sub> ·H <sub>2</sub><br>O (42.32 mg,<br>0.25 mmol)  |                                                                |                       |
|                                   |                     |                                                                  |                                                                |                       |
| Different solvents                |                     | EtOH(2ml,<br>H <sub>2</sub> O (5 ml)                             | Crystals of complex 4                                          |                       |
|                                   |                     | EtOH(5ml,<br>H <sub>2</sub> O (2 ml)                             | Precipitation                                                  |                       |

|  | Variable      |  | Results                              |                       |
|--|---------------|--|--------------------------------------|-----------------------|
|  | Solvent ratio |  | DMF(7ml)                             | Precipitation         |
|  |               |  | DMF(3ml),<br>H <sub>2</sub> O (4 ml) | Crystals of complex 3 |
|  |               |  | DMF(1ml),<br>H <sub>2</sub> O (6 ml) |                       |



|                                       |                     |                                                            |                              |
|---------------------------------------|---------------------|------------------------------------------------------------|------------------------------|
| Related synthesis of complex <b>3</b> | Temperature(°C)     | 120 °C                                                     | Crystals of complex <b>3</b> |
|                                       |                     | 140 °C                                                     |                              |
|                                       |                     | 160 °C                                                     |                              |
|                                       | Dosage of metal ion | MnSO <sub>4</sub> ·H <sub>2</sub> O (8.46 mg, 0.05 mmol)   | Crystals of complex <b>3</b> |
|                                       |                     | MnSO <sub>4</sub> ·H <sub>2</sub> O (25.40 mg, 0.15 mmol ) |                              |
|                                       |                     | MnSO <sub>4</sub> ·H <sub>2</sub> O (42.32 mg, 0.25 mmol)  |                              |
|                                       | Different solvents  | EtOH(2ml, H <sub>2</sub> O (5 ml)                          | Crystals of complex <b>5</b> |
|                                       |                     | EtOH(5ml, H <sub>2</sub> O (2 ml)                          | Precipitation                |

**Tables S2.** Selected bond lengths (Å) and angles (°) for complexes 1-6.

Complex 1

|                                      |           |                                      |            |
|--------------------------------------|-----------|--------------------------------------|------------|
| Mn1—O6 <sup>i</sup>                  | 2.127 (2) | Mn2—O1                               | 2.127 (3)  |
| Mn1—O6                               | 2.127 (2) | Mn2—O11                              | 2.153 (3)  |
| Mn1—O2                               | 2.148 (2) | Mn2—O5                               | 2.155 (2)  |
| Mn1—O2 <sup>i</sup>                  | 2.148 (2) | Mn2—O7                               | 2.184 (2)  |
| Mn1—O9 <sup>i</sup>                  | 2.272 (2) | Mn2—O10                              | 2.212 (2)  |
| Mn1—O9                               | 2.272 (2) | Mn2—O9                               | 2.251 (2)  |
| O6 <sup>i</sup> —Mn1—O6              | 180.0     | O2—Mn1—O2 <sup>i</sup>               | 180.00 (6) |
| O6 <sup>i</sup> —Mn1—O2              | 88.68 (9) | O6 <sup>i</sup> —Mn1—O9 <sup>i</sup> | 92.21 (8)  |
| O6—Mn1—O2                            | 91.31 (9) | O6—Mn1—O9 <sup>i</sup>               | 87.79 (8)  |
| O6 <sup>i</sup> —Mn1—O2 <sup>i</sup> | 91.32 (9) | O2—Mn1—O9 <sup>i</sup>               | 89.49 (9)  |
| O6—Mn1—O2 <sup>i</sup>               | 88.69 (9) | O2 <sup>i</sup> —Mn1—O9 <sup>i</sup> | 90.51 (9)  |
| O6 <sup>i</sup> —Mn1—O9              | 87.79 (8) | O1—Mn2—O5                            | 94.48 (10) |
| O6—Mn1—O9                            | 92.21 (8) | O11—Mn2—O5                           | 87.73 (10) |
| O2—Mn1—O9                            | 90.51 (9) | O1—Mn2—O7                            | 84.79 (11) |
| O2 <sup>i</sup> —Mn1—O9              | 89.49 (9) | O11—Mn2—O7                           | 93.73 (10) |

|                         |            |            |             |
|-------------------------|------------|------------|-------------|
| O9 <sup>i</sup> —Mn1—O9 | 180.0      | O5—Mn2—O7  | 178.34 (10) |
| O1—Mn2—O11              | 88.20 (10) | O1—Mn2—O10 | 169.19 (10) |
| O11—Mn2—O10             | 86.38 (10) | O11—Mn2—O9 | 177.14 (9)  |
| O5—Mn2—O10              | 94.65 (10) | O5—Mn2—O9  | 90.99 (9)   |
| O7—Mn2—O10              | 86.23 (10) | O7—Mn2—O9  | 87.58 (9)   |
| O1—Mn2—O9               | 94.45 (9)  | O10—Mn2—O9 | 91.18 (8)   |

Symmetry codes: (i)  $-x+1/2, -y+1/2, -z+1$ ; (ii)  $x, -y, z-1/2$ ; (iii)  $x, -y, z+1/2$ .

### Complex 2

|                                         |             |                                          |             |
|-----------------------------------------|-------------|------------------------------------------|-------------|
| Mn1—O3 <sup>i</sup>                     | 2.089 (3)   | Mn1—O9                                   | 2.338 (3)   |
| Mn1—O2 <sup>i</sup>                     | 2.109 (3)   | Mn2—O4 <sup>iii</sup>                    | 2.119 (3)   |
| Mn1—O8                                  | 2.115 (3)   | Mn2—O1 <sup>i</sup>                      | 2.138 (3)   |
| Mn1—O11 <sup>ii</sup>                   | 2.235 (3)   | Mn2—O10                                  | 2.216 (3)   |
| Mn1—O10                                 | 2.284 (3)   | Mn2—O9 <sup>iv</sup>                     | 2.233 (3)   |
| Mn2—O11 <sup>ii</sup>                   | 2.270 (3)   | Mn2—N1                                   | 2.235 (4)   |
| O3 <sup>i</sup> —Mn1—O2 <sup>i</sup>    | 88.47 (14)  | O8—Mn1—O10                               | 87.16 (11)  |
| O3 <sup>i</sup> —Mn1—O8                 | 97.94 (14)  | O11 <sup>ii</sup> —Mn1—O10               | 74.51 (10)  |
| O2 <sup>i</sup> —Mn1—O8                 | 98.28 (13)  | O3 <sup>i</sup> —Mn1—O9                  | 86.85 (13)  |
| O3 <sup>i</sup> —Mn1—O11 <sup>ii</sup>  | 101.13 (13) | O2 <sup>i</sup> —Mn1—O9                  | 174.84 (13) |
| O2 <sup>i</sup> —Mn1—O11 <sup>ii</sup>  | 92.08 (12)  | O8—Mn1—O9                                | 84.53 (11)  |
| O8—Mn1—O11 <sup>ii</sup>                | 158.51 (12) | O11 <sup>ii</sup> —Mn1—O9                | 86.70 (10)  |
| O3 <sup>i</sup> —Mn1—O10                | 173.79 (14) | O10—Mn1—O9                               | 97.21 (11)  |
| O2 <sup>i</sup> —Mn1—O10                | 87.29 (12)  | O4 <sup>iii</sup> —Mn2—O1 <sup>i</sup>   | 170.32 (14) |
| O4 <sup>iii</sup> —Mn2—O10              | 93.84 (13)  | O10—Mn2—N1                               | 172.97 (13) |
| O1 <sup>i</sup> —Mn2—O10                | 90.74 (12)  | O9 <sup>iv</sup> —Mn2—N1                 | 95.24 (13)  |
| O4 <sup>iii</sup> —Mn2—O9 <sup>iv</sup> | 96.77 (12)  | O4 <sup>iii</sup> —Mn2—O11 <sup>ii</sup> | 86.12 (12)  |
| O1 <sup>i</sup> —Mn2—O9 <sup>iv</sup>   | 91.66 (12)  | O1 <sup>i</sup> —Mn2—O11 <sup>ii</sup>   | 86.83 (12)  |
| O10—Mn2—O9 <sup>iv</sup>                | 90.94 (11)  | O10—Mn2—O11 <sup>ii</sup>                | 75.17 (11)  |
| O4 <sup>iii</sup> —Mn2—N1               | 88.74 (14)  | O9 <sup>iv</sup> —Mn2—O11 <sup>ii</sup>  | 166.00 (10) |
| O1 <sup>i</sup> —Mn2—N1                 | 85.76 (13)  | N1—Mn2—O11 <sup>ii</sup>                 | 98.52 (13)  |

Symmetry codes: (i)  $-x, -y+1, -z+2$ ; (ii)  $-x, y+1/2, -z+3/2$ ; (iii)  $x, -y+1/2, z-1/2$ ; (iv)  $-x, y-1/2, -z+3/2$

## Complex 3

|                         |             |                                      |             |
|-------------------------|-------------|--------------------------------------|-------------|
| Mn1—O4                  | 2.101 (3)   | Mn2—O1                               | 2.106 (3)   |
| Mn1—O2                  | 2.123 (3)   | Mn2—O1 <sup>i</sup>                  | 2.106 (3)   |
| Mn1—O5                  | 2.162 (3)   | Mn2—O3 <sup>i</sup>                  | 2.161 (3)   |
| Mn1—O9                  | 2.249 (2)   | Mn2—O3                               | 2.161 (3)   |
| Mn1—N1                  | 2.256 (3)   | Mn2—O9 <sup>i</sup>                  | 2.296 (2)   |
| Mn1—N2                  | 2.280 (3)   | Mn2—O9                               | 2.296 (2)   |
| O4—Mn1—O2               | 92.97 (11)  | O2—Mn1—O9                            | 91.11 (9)   |
| O4—Mn1—O5               | 85.30 (11)  | O5—Mn1—O9                            | 84.36 (9)   |
| O2—Mn1—O5               | 174.93 (10) | O4—Mn1—N1                            | 91.02 (11)  |
| O4—Mn1—O9               | 96.54 (10)  | O2—Mn1—N1                            | 89.75 (11)  |
| O5—Mn1—N1               | 95.04 (11)  | O1 <sup>i</sup> —Mn2—O3 <sup>i</sup> | 90.47 (11)  |
| O9—Mn1—N1               | 172.34 (10) | O1—Mn2—O3                            | 90.47 (11)  |
| O4—Mn1—N2               | 163.50 (11) | O1 <sup>i</sup> —Mn2—O3              | 89.53 (11)  |
| O2—Mn1—N2               | 92.72 (10)  | O3 <sup>i</sup> —Mn2—O3              | 180.00 (14) |
| O5—Mn1—N2               | 90.23 (10)  | O1—Mn2—O9 <sup>i</sup>               | 87.44 (10)  |
| O9—Mn1—N2               | 98.82 (10)  | O1 <sup>i</sup> —Mn2—O9 <sup>i</sup> | 92.56 (10)  |
| N1—Mn1—N2               | 73.54 (11)  | O3 <sup>i</sup> —Mn2—O9 <sup>i</sup> | 98.87 (9)   |
| O1—Mn2—O1 <sup>i</sup>  | 180.0       | O3—Mn2—O9 <sup>i</sup>               | 81.13 (9)   |
| O1—Mn2—O3 <sup>i</sup>  | 89.53 (11)  | O1—Mn2—O9                            | 92.56 (10)  |
| O3 <sup>i</sup> —Mn2—O9 | 81.13 (9)   | O9 <sup>i</sup> —Mn2—O9              | 180.00 (14) |
| O3—Mn2—O9               | 98.87 (9)   |                                      |             |

Symmetry codes: (i)  $-x+1/2, -y+1/2, -z+1$ ; (ii)  $x, -y+1, z-1/2$

## Complex 4

|                         |            |                         |             |
|-------------------------|------------|-------------------------|-------------|
| Mn1—O6 <sup>i</sup>     | 2.142 (2)  | Mn1—N1                  | 2.244 (3)   |
| Mn1—O5                  | 2.151 (2)  | Mn1—N5                  | 2.254 (3)   |
| Mn1—N4                  | 2.231 (3)  | Mn1—O9                  | 2.314 (2)   |
| O6 <sup>i</sup> —Mn1—O5 | 110.85 (9) | N4—Mn1—N1               | 178.69 (11) |
| O6 <sup>i</sup> —Mn1—N4 | 89.37 (10) | O6 <sup>i</sup> —Mn1—N5 | 163.70 (9)  |
| O5—Mn1—N4               | 92.24 (10) | O5—Mn1—N5               | 85.21 (10)  |
| O6 <sup>i</sup> —Mn1—N1 | 89.68 (9)  | N4—Mn1—N5               | 92.89 (11)  |
| O5—Mn1—N1               | 87.25 (10) | N1—Mn1—N5               | 88.27 (10)  |

|                         |            |           |           |
|-------------------------|------------|-----------|-----------|
| O6 <sup>i</sup> —Mn1—O9 | 82.49 (8)  | N1—Mn1—O9 | 90.75 (9) |
| O5—Mn1—O9               | 166.48 (8) | N5—Mn1—O9 | 81.37 (9) |
| N4—Mn1—O9               | 90.03 (10) |           |           |

Symmetry codes: (i)  $-x+1, -y+1, -z+1$ ; (ii)  $x, y-1, z$

#### Complex 5

|                                         |             |                                       |             |
|-----------------------------------------|-------------|---------------------------------------|-------------|
| Mn1—O2                                  | 2.1233 (14) | Mn1—N2                                | 2.2531 (12) |
| Mn1—O8 <sup>ii</sup>                    | 2.1530 (13) | Mn1—N1                                | 2.2905 (15) |
| Mn1—O6 <sup>iii</sup>                   | 2.1939 (11) | Mn1—O1                                | 2.3123 (11) |
| Mn2—O9                                  | 2.0935 (16) | O1—Mn2 <sup>ii</sup>                  | 2.2147 (11) |
| Mn2—O9 <sup>i</sup>                     | 2.0935 (16) | Mn2—N3 <sup>i</sup>                   | 2.236 (3)   |
| Mn2—O1 <sup>iv</sup>                    | 2.2148 (11) | Mn2—N3A <sup>i</sup>                  | 2.408 (3)   |
| Mn2—O1 <sup>v</sup>                     | 2.2148 (11) |                                       |             |
| O2—Mn1—O8 <sup>ii</sup>                 | 86.33 (5)   | O6 <sup>iii</sup> —Mn1—N1             | 84.61 (5)   |
| O2—Mn1—O6 <sup>iii</sup>                | 90.19 (5)   | N2—Mn1—N1                             | 73.05 (5)   |
| O8 <sup>ii</sup> —Mn1—O6 <sup>iii</sup> | 169.23 (4)  | O2—Mn1—O1                             | 89.61 (4)   |
| O2—Mn1—N2                               | 95.90 (5)   | O8 <sup>ii</sup> —Mn1—O1              | 84.30 (5)   |
| O8 <sup>ii</sup> —Mn1—N2                | 84.13 (5)   | O6 <sup>iii</sup> —Mn1—O1             | 85.48 (4)   |
| O6 <sup>iii</sup> —Mn1—N2               | 106.39 (4)  | N2—Mn1—O1                             | 166.84 (4)  |
| O2—Mn1—N1                               | 165.79 (4)  | N1—Mn1—O1                             | 103.11 (5)  |
| O8 <sup>ii</sup> —Mn1—N1                | 101.04 (5)  | Mn2 <sup>ii</sup> —O1—Mn1             | 123.48 (5)  |
| O9—Mn2—O9 <sup>i</sup>                  | 119.59 (8)  | O9 <sup>i</sup> —Mn2—O1 <sup>v</sup>  | 86.62 (5)   |
| O9—Mn2—O1 <sup>iv</sup>                 | 86.62 (5)   | O1 <sup>iv</sup> —Mn2—O1 <sup>v</sup> | 165.63 (6)  |
| O9 <sup>i</sup> —Mn2—O1 <sup>iv</sup>   | 86.17 (5)   | O9—Mn2—N3                             | 94.60 (8)   |
| O9—Mn2—O1 <sup>v</sup>                  | 86.17 (5)   | O9 <sup>i</sup> —Mn2—N3               | 145.22 (8)  |
| O1 <sup>iv</sup> —Mn2—N3                | 89.98 (7)   | O1 <sup>iv</sup> —Mn2—N3 <sup>i</sup> | 102.97 (14) |
| O1 <sup>v</sup> —Mn2—N3                 | 102.97 (7)  | O1 <sup>v</sup> —Mn2—N3 <sup>i</sup>  | 89.98 (13)  |
| O9—Mn2—N3 <sup>i</sup>                  | 145.22 (10) | N3—Mn2—N3 <sup>i</sup>                | 52.72 (15)  |
| O9 <sup>i</sup> —Mn2—N3 <sup>i</sup>    | 94.60 (10)  | O9—Mn2—N3A <sup>i</sup>               | 162.78 (11) |
| O9 <sup>i</sup> —Mn2—N3A <sup>i</sup>   | 76.50 (11)  | O9 <sup>i</sup> —Mn2—N3A              | 162.78 (7)  |
| O1 <sup>iv</sup> —Mn2—N3A <sup>i</sup>  | 101.42 (13) | O1 <sup>iv</sup> —Mn2—N3A             | 88.93 (6)   |
| O1 <sup>v</sup> —Mn2—N3A <sup>i</sup>   | 88.93 (13)  | O1 <sup>v</sup> —Mn2—N3A              | 101.42 (6)  |

|            |           |                           |            |
|------------|-----------|---------------------------|------------|
| O9—Mn2—N3A | 76.50 (7) | N3A <sup>i</sup> —Mn2—N3A | 88.34 (15) |
|------------|-----------|---------------------------|------------|

Symmetry codes: (i)  $-x+1, y, -z+1/2$ ; (ii)  $x, y-1, z$ ; (iii)  $-x+1, -y, -z$ ; (iv)  $x, y+1, z$ ; (v)  $-x+1, y+1, -z+1/2$

#### Complex 6

|                         |             |                         |             |
|-------------------------|-------------|-------------------------|-------------|
| Mn1—O8 <sup>i</sup>     | 2.053 (3)   | Mn1—N1                  | 2.226 (3)   |
| Mn1—O9                  | 2.127 (3)   | Mn1—N2                  | 2.249 (3)   |
| Mn1—O1                  | 2.192 (3)   | Mn1—O2                  | 2.518 (3)   |
| O8 <sup>i</sup> —Mn1—O9 | 94.69 (11)  | O8 <sup>i</sup> —Mn1—N2 | 168.90 (12) |
| O8 <sup>i</sup> —Mn1—O1 | 95.09 (11)  | O9—Mn1—N2               | 85.63 (10)  |
| O9—Mn1—O1               | 150.71 (10) | O1—Mn1—N2               | 89.90 (11)  |
| O8 <sup>i</sup> —Mn1—N1 | 96.96 (11)  | N1—Mn1—N2               | 72.62 (12)  |
| O9—Mn1—N1               | 110.15 (11) | O8 <sup>i</sup> —Mn1—O2 | 105.91 (10) |
| O1—Mn1—N1               | 95.95 (11)  | O9—Mn1—O2               | 95.84 (9)   |
| O1—Mn1—O2               | 54.91 (9)   | N2—Mn1—O2               | 85.06 (10)  |
| N1—Mn1—O2               | 143.72 (10) | O1—C1—O2                | 121.8 (4)   |

Symmetry codes: (ii)  $-x+1, -y+2, -z$ ; (iii)  $x+1, y, z$ ; (iv)  $x, y-1, z$ ; (v)  $x, y+1, z$

#### References

- S1** D. D. Yang, L. P. Lu and M. L. Zhu, *Acta Crystallogr., Sect. C: Struct. Chem.*, 2019, **75**, 1580-1592.
- S2** F. Su, L. Lu, S. Feng and M. Zhu, *CrystEngComm*, 2014, **16**, 7990 - 7999.
- S3** D. D. Yang, L. P. Lu and M. L. Zhu, *CrystEngComm*, 2020, **22**, 5207 - 5217.
